# Supplementary material
Source: Springer Nature journal article supplement (http://www.springermedizin.de/resource/supplementary/12937_2012_584_MOESM2_ESM.pdf/25653370)

Ages 25-50Ages 51-85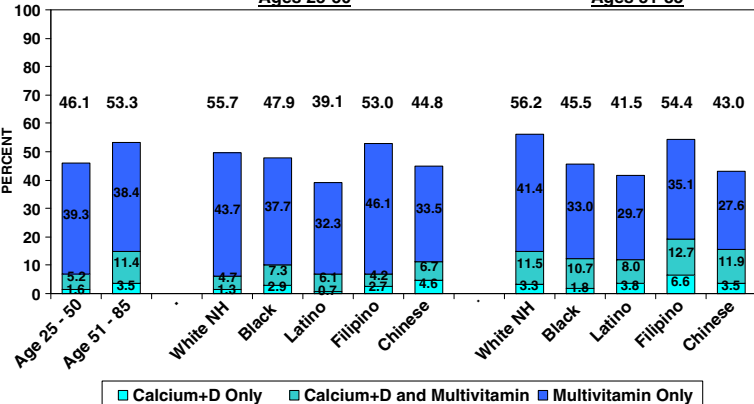

Supplement: MOESM2 [file 25653370]
